# Supplementary material for: MiR-138 is a potent regulator of the heterogenous MYC transcript population in cancers
Source: PubMed Central journal article supplement (PMC8856960; doi:10.1038/s41388-021-02084-x), 2021-12-22
Supplement: 41388_2021_2084_MOESM1_ESM.pdf [file 41388_2021_2084_MOESM1_ESM.pdf]

# Supplementary Fig. S1

**A**

| MicroRNAs   | Relative Enrichment |       |
|-------------|---------------------|-------|
|             | Set A               | Set B |
| MiR-193a-5p | 1.61                | 1.54  |
| MiR-197-3p  | 1.74                | 1.86  |
| MiR-28-5p   | 26.35               | 1.97  |
| MiR-99b-3p  | 1.62                | 1.51  |

**B**

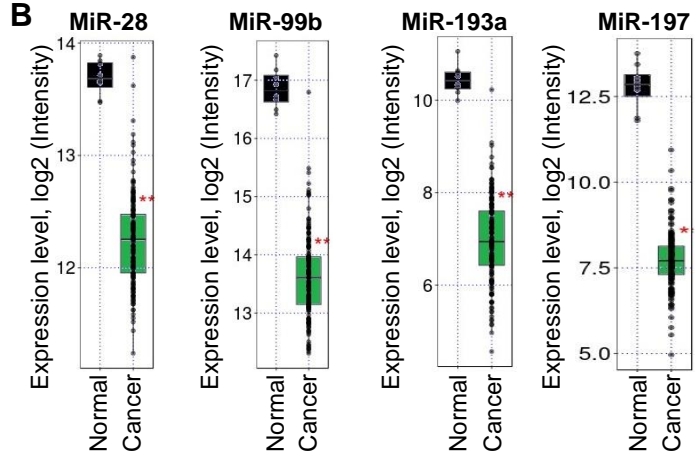

**C**

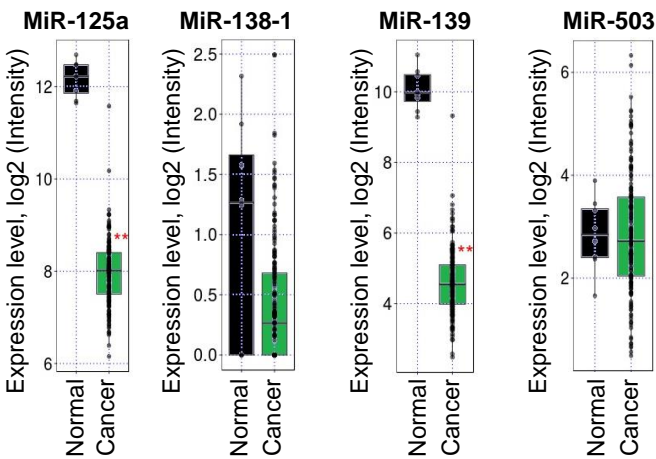

**D**

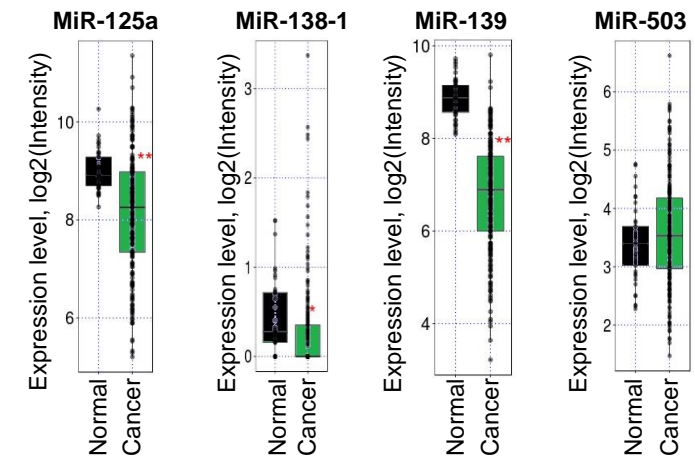

**E**

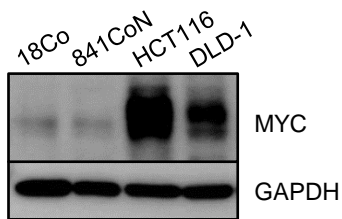

**F**

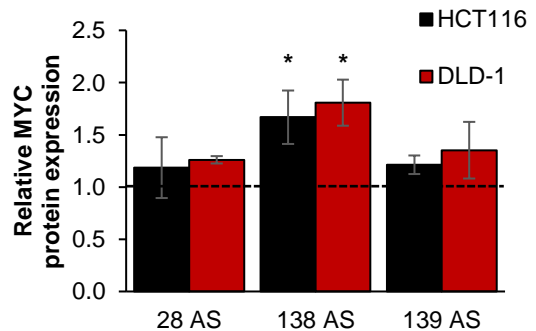

## Supplementary Fig. S1 Identification of potential *MYC* CDS-targeting miRNAs.

**a** Enrichment of candidate miRNAs in the MS2-TRAP pulldown of the *MYC* CDS relative to EV control. **b** Expression of miRNAs (miR-28-5p, miR-99b-3p, miR-193a-5p, and miR-197-3p) enriched in the *MYC* CDS pulldown in the TCGA-COAD dataset [8 normal versus 178 cancer]. **c, d** Expression of predicted *MYC* CDS-targeting miRNAs (miR-125a-3p, miR-138, miR-139-3p and miR-503-5p) in the TCGA-COAD [**c**] and TCGA-LIHC [**d**] datasets. **e** Western blot analysis of *MYC* protein expression in normal colon (CCD-18Co and CCD841CoN) and CRC cell lines (HCT116 and DLD-1). **f** Densitometry quantification of *MYC* protein expression upon miRNA inhibition by antisense miRNA inhibitors (AS) in HCT116 and DLD-1. Mean  $\pm$  SEM; N  $\geq$  3. \* $P$  < 0.05; \*\* $P$  < 0.01; \*\*\* $P$  < 0.001.

## Supplementary Fig. S2

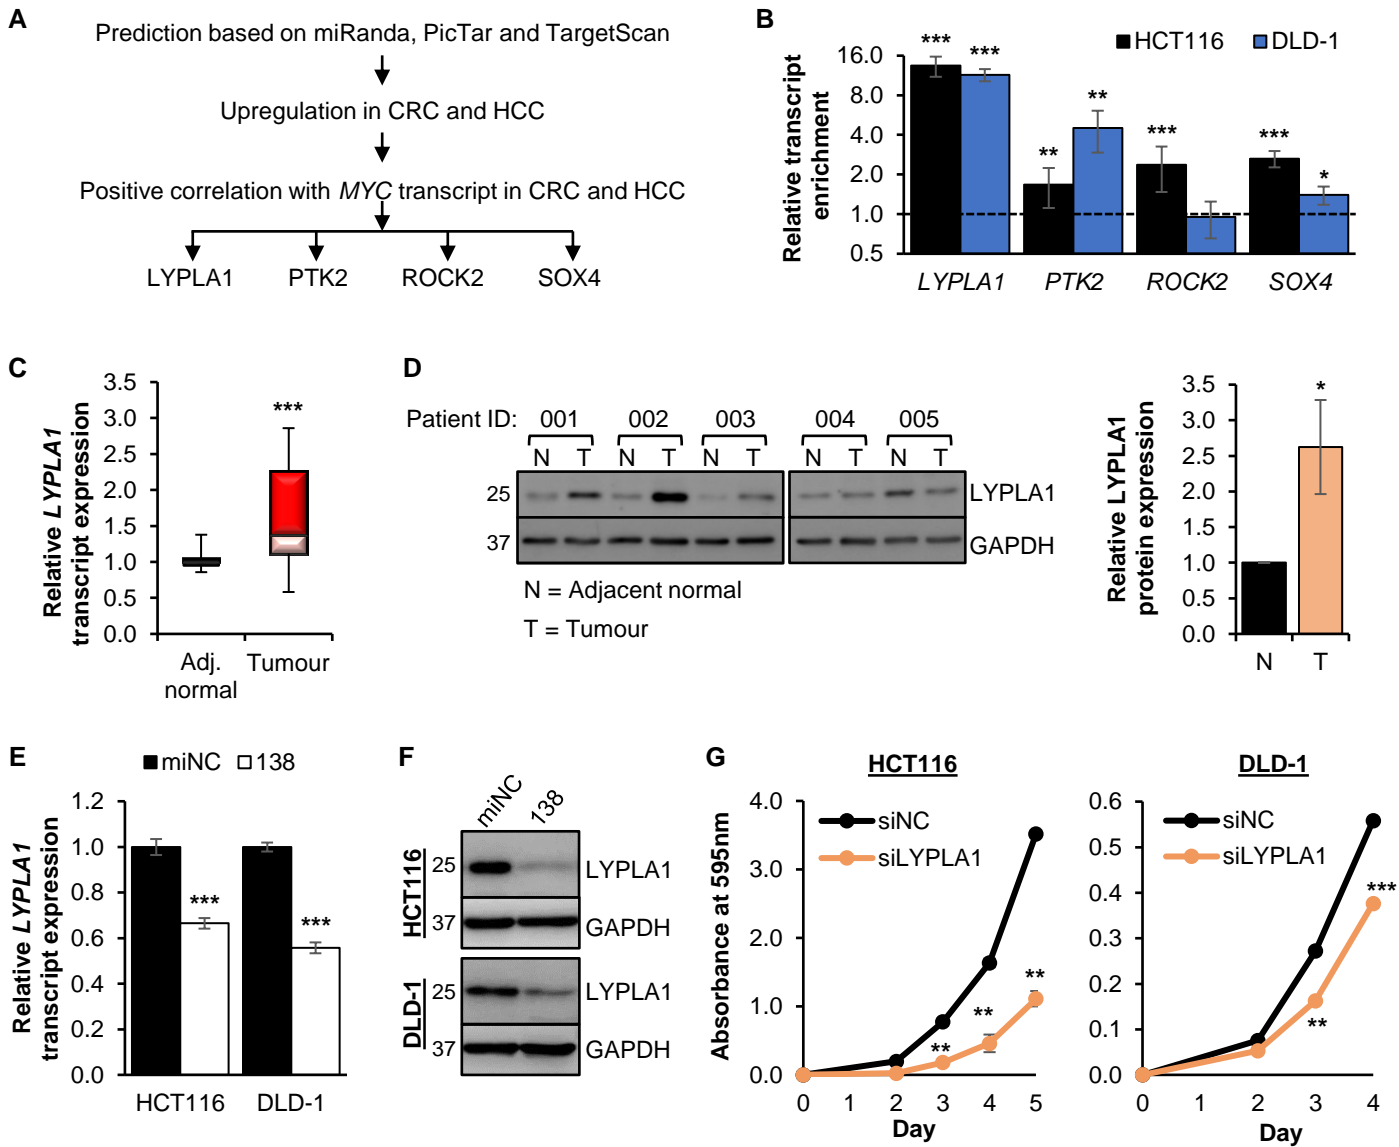

### Supplementary Fig S2. MiR-138-mediated regulation of LYPLA1.

**a** Flowchart outlining the steps for the identification of potential miR-138 targets in CRC and HCC. The shortlisted targets were predicted by all three platforms. **b** RT-qPCR analysis of potential miR-138 target transcript enrichment upon biotinylated miR-138 pulldown in HCT116 and DLD-1 cell lines. **c, d** RT-qPCR and western blot analyses of *LYPLA1* transcript (**c**) and protein (**d**) levels in adjacent normal (N) and tumour (T) samples from CRC patients. **e, f** Effect of miR-138 overexpression on the transcript and protein expression of *LYPLA1* detected by RT-qPCR (**e**) and western blot (**f**) analyses respectively in HCT116 and DLD-1. **g** Effect of *LYPLA1* knockdown on anchorage-dependent growth of HCT116 (left panel) and DLD-1 (right panel). (**b, c, d** and **e**) Mean  $\pm$  SEM;  $N \geq 3$ . (**g**) Mean  $\pm$  STD;  $N \geq 3$ . \* $P < 0.05$ ; \*\* $P < 0.01$ ; \*\*\* $P < 0.001$ .

# Supplementary Fig. S3

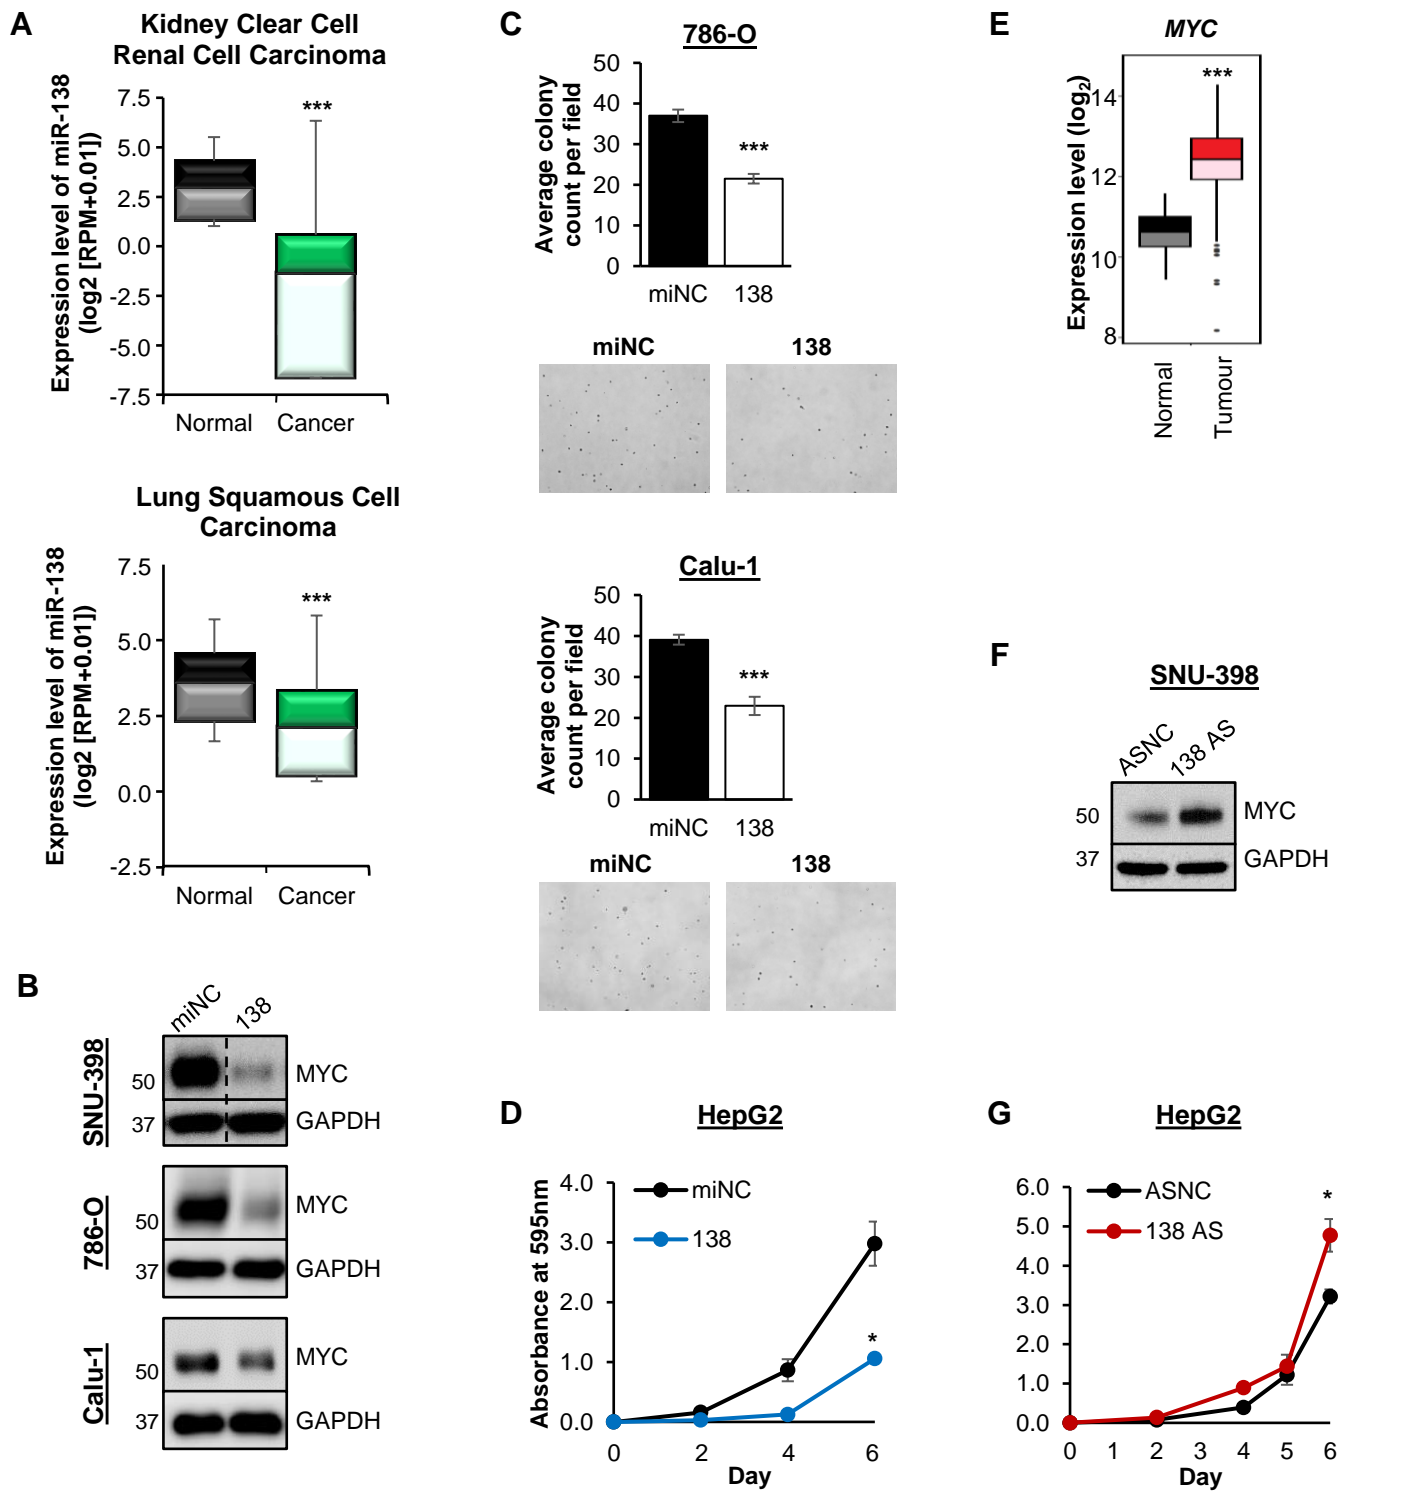

## Supplementary Fig S3. MiR-138 consistently inhibits MYC expression and cell proliferation in other cancers.

**a** MiR-138 expression in the kidney clear cell renal cell carcinoma (ccRCC) [71 normal versus 517 cancers] (top panel), and lung squamous cell carcinoma (SCC) [38 normal versus 475 cancers] (bottom panel) based on the TCGA datasets. **b** Effect of miR-138 expression (138) on MYC protein expression in liver hepatocellular carcinoma (HCC) cell line, SNU-398 (top panel), kidney ccRCC cell line, 786-O (middle panel), and lung SCC cell line, Calu-1 (bottom panel). **c, d** Effects of miR-138 overexpression (138) on the anchorage-independent growth 786-O (top panel), and Calu-1 (bottom panel) (**c**) and anchorage-dependent growth of HepG2 (**d**). **e** Analysis of *MYC* transcript expression in the TCGA-LIHC dataset [41 normal versus 210 cancer]. **f** Western blot analysis of MYC protein expression upon miR-138 inhibition (138 AS) in the HCC cell line, SNU-398. **g** Effect of miR-138 inhibition (138 AS) on the anchorage-dependent growth of HepG2. (**c**) Mean  $\pm$  SEM;  $N \geq 3$ . (**d** and **g**) Mean  $\pm$  STD;  $N \geq 3$ . \* $P < 0.05$ ; \*\*\* $P < 0.001$ .

# Supplementary Fig. S4

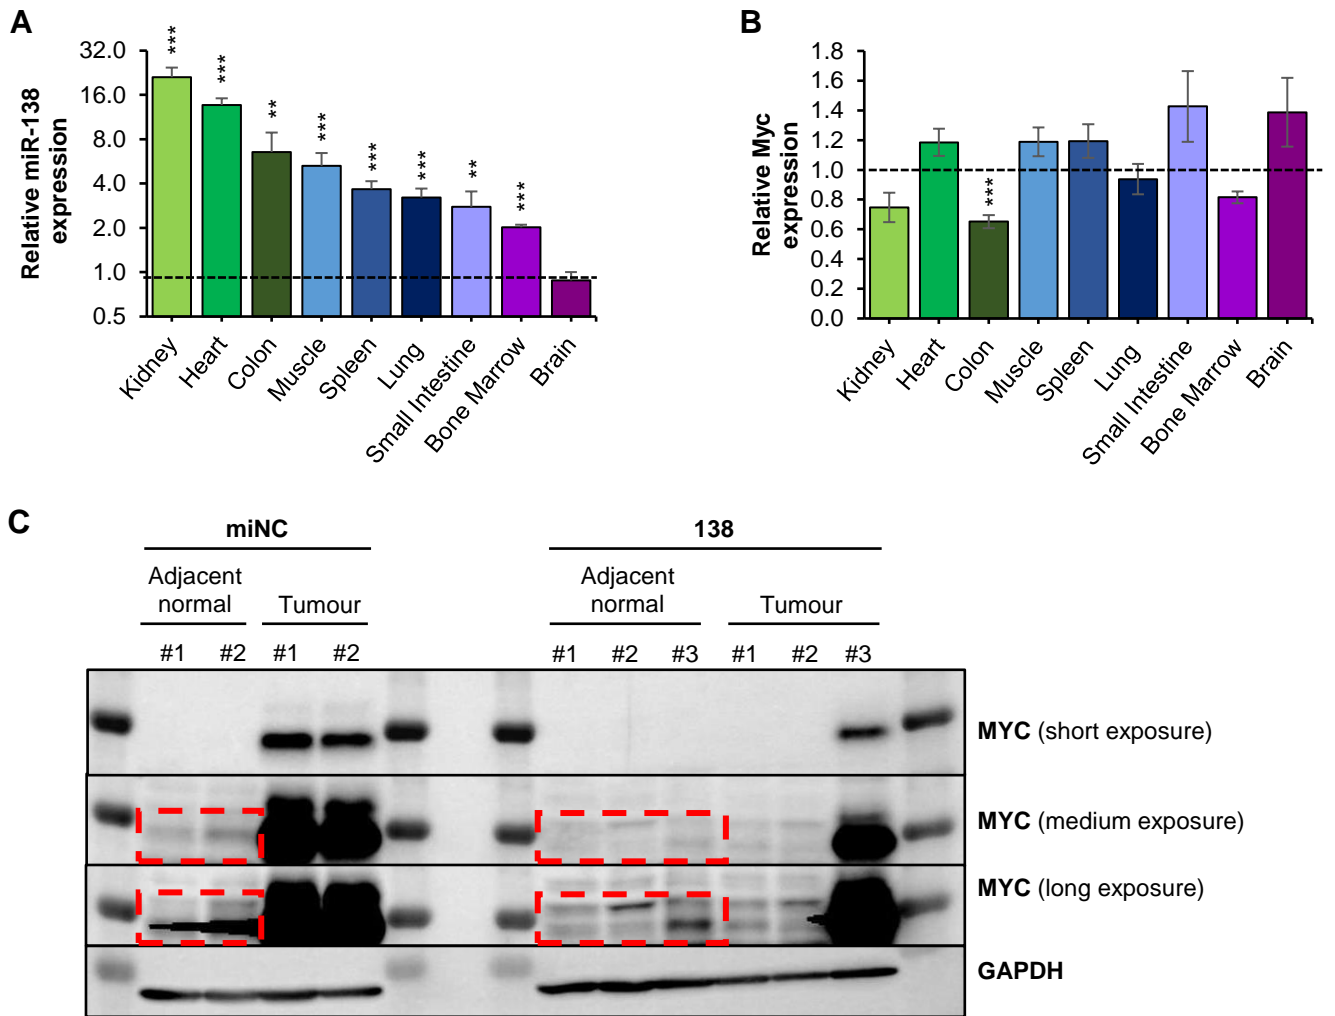

## Supplementary Fig S4. Effect of miR-138 on MYC-driven carcinogenesis in vivo.

**a, b** RT-qPCR analyses of miR-138 (**a**) and Myc transcript (**b**) expression in different tissues after the miR-138 mimic injection compared to miNC injection (N = 5). **c** Western blot analysis of MYC protein levels in LAP-tTA x tet-o-MYC mice one week after the last injection of miNC or miR-138 mimics. The red boxes highlight MYC protein expression in the adjacent normal samples. Mean  $\pm$  SEM. \*\* $P < 0.01$ ; \*\*\* $P < 0.001$ .
