# Supplementary material for: MiR-138 is a potent regulator of the heterogenous MYC transcript population in cancers
Source: PubMed Central journal article supplement (PMC8856960; doi:10.1038/s41388-021-02084-x), 2021-12-22
Supplement: 41388_2021_2084_MOESM2_ESM.pdf [file 41388_2021_2084_MOESM2_ESM.pdf]

## Supplementary Tables

**Supplementary Table S1: Predicted miRNA binding sites on the human and mouse *MYC* CDS by RNA22**

| MicroRNAs   | Heteroduplex in human                                                        | Heteroduplex in mouse                                                         | Position in human/mouse |
|-------------|------------------------------------------------------------------------------|-------------------------------------------------------------------------------|-------------------------|
| MiR-125a-3p | TGCTGCCCA--CCCCGCCCTGT<br>                  <br>CCGA-GGGTTCTTGGAGTGGACA      | TGCTTCCCA--CCCCGCCCTGT<br>                  <br>CCGA-GGGTTCTTGGAGTGGACA       | 164/164                 |
|             | GGTGAACCA-GAGTTTCATCTGC<br>  :      :    :    <br>CCG-AGGGTTCTTGGAGTGGACA    | GGTGAACCA-GAGCTTCATCTGC<br>  :      :  :    :    <br>CCG-AGGGTTCTTGGAGTGGACA  | 330/333                 |
|             | ACCTCCTCACAGCC-CACTGGT<br>   :    :       :   <br>CCGAGGGTTCTTGGAGTGGACA     | ACCTCCGCA-CAGCC-CACTGGT<br>        :       :   <br>CCGAGG-GTTCTTGGAGTGGACA    | 867/867                 |
| MiR-138-5p  | AGG-AGGA-GAACTTCTACCAGCA<br>         :      <br>GCCGGACTAAGTG-TTGTGGTCGA     | AGGAAGAGAATTTTC-TATCACCAGCA<br>                <br>GCC-GGACT--AAGTGTTGTGGTCGA | 80/80                   |
|             | GCGTCTG-CTC-CACCTCCAGCT<br> :                 <br>GCCGGACTAAGTGTTGTGGTCGA    | GCGTCTG-CTC-CACCTCCAGCC<br> :                 <br>GCCGGACTAAGTGTTGTGGTCGA     | 506/509                 |
|             | GTGCCACGTCTCCACA-CATCAGCA<br>          :      <br>GCCGG--ACTAAGTGTTGTGGTCGA  | GTGCCACGTCTCCAC-TCACCAGCA<br>                <br>GCCGG--ACTAAGTGTTGTGGTCGA    | 897/897                 |
| MiR-139-3p  | TCCTCAAGAGGTGCCACGTCTCCA<br>            <br>TGAGGTTGTCC-CGGCGCAGAGGT         | CCTCAAGAGGTGCCACGTCTCCA<br>                   <br>GAGGTTGTCC-CGGCGCAGAGGT     | 887/888                 |
| MiR-503-5p  | CTGGAAGAA--ATTTCGAGCTGCTG<br>                  :<br>GAC-GTCTTGACAAGGGCGACGAT | CTGGAAGA-AATTTCGAGCTGCTT<br>                 <br>GACGTCATGACAAGGGCGACGAT      | 147/147                 |

|            |                        |                        |         |
|------------|------------------------|------------------------|---------|
| MiR-744-5p | AGCTG-CTGCCC--ACCCCGCC | AGCTG-CTTCCC--ACCCCGCC | 161/161 |
|            |                        |                        |         |
|            | ACGACAATCGGGATCGGGGCGT | ACGACAATCGGGATCGGGGCGT |         |

For the heteroduplex, the top strand denotes the MRE sequence in the 5' - 3' direction, while the bottom strand denotes the miRNA sequence in the 3' - 5' direction.

**Supplementary Table S2: Predicted miR-138 MREs on the human and mouse *MYC* CDS by RNA22**

| MREs | Heteroduplex (Human)                                                                    | Heteroduplex (Mouse)                                                                                | Leftmost position (Human/Mouse) |
|------|-----------------------------------------------------------------------------------------|-----------------------------------------------------------------------------------------------------|---------------------------------|
| A    | AGG-AGGA-GAACTTCTACCAGCA<br>        :          <br>GCCGGACTAAGTG-TTGTGGTCGA             | AGGAAGAGAAATTC-TATCACCAGCA<br>                             <br>GCC-GGACT--AAGTGTTGTGGTCGA           | 80/80                           |
| B    | GCGTCTG-CTC-CACCTCCAGCT<br>  :                              <br>GCCGGACTAAGTGTTGTGGTCGA | GCGTCTG-CTC-CACCTCCAGCC<br>  :                              <br>GCCGGACTAAGTGTTGTGGTCGA             | 506/509                         |
| C    | GTGCCACGTCTCCACA-CATCAGCA<br>                  :          <br>GCCGG--ACTAAGTGTTGTGGTCGA | GTGCCACGTCTCCAC-TCACCAGCA<br>                                         <br>GCCGG--ACTAAGTGTTGTGGTCGA | 897/897                         |

For the heteroduplex, the top strand denotes the MRE sequence in the 5' - 3' direction, while the bottom strand denotes the miRNA sequence in the 3' - 5' direction. Red font indicates the different nucleotides between the human and mouse *MYC* sequences.

**Supplementary Table S3: Predicted miR-138 MREs on the human MYC CDS by STarMir**

| Sites | Predicted Bindings |     |     |      |         |         |          |     |
|-------|--------------------|-----|-----|------|---------|---------|----------|-----|
| 1     | 5'→3'              |     | A   | AG   | GA      | UUC     |          | A   |
|       | Target             | 81  | GG  | GA   | AC      | UACCAGC |          | 100 |
|       |                    |     |     |      |         |         |          |     |
|       | miRNA              | 23  | CC  | CU   | UG      | GUGGUCG |          | 1   |
|       | 3'→5'              |     | G   | GGA  | AAG     | UU      |          | A   |
| 2     | 5'→3'              |     | U   | GG   | GCUUCUC |         | CG       | G   |
|       | Target             | 268 | GGC | GA   |         | CACGGC  | ACCAGCU  | 296 |
|       |                    |     |     |      |         |         |          |     |
|       | miRNA              | 23  | CCG | CU   |         | GUGUUG  | UGGUCGA  | 1   |
|       | 3'→5'              |     | G   | GA   | AA      |         |          |     |
| 3     | 5'→3'              |     | C   | ACGA | GA      | CC      | CAAA     | N   |
|       | Target             | 356 | CGG | C    | GA      | UUCAU   | AACAUCA  | 385 |
|       |                    |     |     |      |         |         |          |     |
|       | miRNA              | 23  | GCC | G    | CU      | AAGUG   | UUGUGGU  | 1   |
|       | 3'→5'              |     | G   | A    |         |         | CGA      |     |
| 4     | 5'→3'              |     | U   | U    | CAA     | GGUGC   | UCUCCAC  | A   |
|       | Target             | 885 | GG  | CCU  | GA      | CACG    | ACAUCAGC | 919 |
|       |                    |     |     |      |         |         |          |     |
|       | miRNA              | 23  | CC  | GGA  | CU      | GUGU    | UGUGGUCG | 1   |
|       | 3'→5'              |     | G   |      | AA      |         | A        |     |

Site 1 is the same site as MRE\_A predicted by RNA22 and site 1 predicted by miRDB.

**Supplementary Table S4: List of primers for MYC 3' RACE**

| Primer Names      | Primer Sequences (5'-3')      |
|-------------------|-------------------------------|
| MYC 3' RACE outer | GTCCAAGCAGAGGAGCAAAA          |
| MYC 3' RACE inner | CCCAAGCTTGGGAAGGACTTGTTCGGAAA |

**Supplementary Table S5: Primers for RT-qPCR**

| Gene Names | Forward Primers (5'-3')   | Reverse Primers (5'-3')    |
|------------|---------------------------|----------------------------|
| MYC        | TTCGGGTAGTGAAAAACCAG      | CAGCAGCTCGAATTTCTTCC       |
| GAPDH      | AGCCACATCGCTCAGACAC       | GCCCAATACGACCAAATCC        |
| ROCK2      | GAGGTCTACAGATGAAGGCAGA    | CCTTGTGACGAACCAACTGC       |
| LYPLA1     | GAGATACTGGGCACGGATGG      | TGTAACAGGCCTAACAGGCG       |
| PTK2       | GTGCTCTTGTTCAAGCTGGAT     | ACTTGAGTGAAGTCAGCAAGATGTGT |
| SOX4       | GGTCTCTAGTTCTTGCACGCTC    | CGGAATCGGCACTAAGGAG        |
| P27        | ACTCGCCGTGTCAATCATTT      | AACACCCCGAAAAGACGAG        |
| CDK4       | TTGTCCGGCTGATGGAC         | GGGTGCCTTGTCCAGATA         |
| CDK6       | CCACTTACTTGGATAAAGTTCCAGA | CAGAATGTTCTGTGGTTTTAGATCG  |

**Supplementary Table S6: Oligonucleotides for cloning miR-138 MREs into psiCHECK-2**

| Oligo Names         | Oligonucleotide Sequences        | Restriction Sites |
|---------------------|----------------------------------|-------------------|
| MRE A Forward       | TCGAGAGGAGGAGAACTTCTACCAGCAGC    | XhoI              |
| MRE A Reverse       | GGCCGCTGCTGGTAGAAGTTCTCCTCCTC    | NotI              |
| MRE B Forward       | TCGAGGCGTCTGCTCCACCTCCAGCTGC     | XhoI              |
| MRE B Reverse       | GGCCGCAGCTGGAGGTGGAGCAGACGCC     | NotI              |
| MRE C Forward       | TCGAGGTGCCACGTCTCCACACATCAGCAGC  | XhoI              |
| MRE C Reverse       | GGCCGCTGCTGATGTGTGGAGACGTGGCACC  | NotI              |
| RC Forward          | TCGAGCGGCCTGATTCACAACACCAGCTGC   | XhoI              |
| RC Reverse          | GGCCGCAGCTGGTGTGTTGTGAATCAGGCCGC | NotI              |
| CDK6 WT Forward     | TCGAGCTTGTGTTTTGTTTTATCACCAGCAGC | XhoI              |
| CDK6 WT Reverse     | GGCCGCTGCTGGTGATAAAAACAAAACAAGC  | NotI              |
| CDK6 Mutant Forward | TCGAGCTTGTGTTTTGTTTTATATATAAAGC  | XhoI              |
| CDK6 Mutant Reverse | GGCCGCTTATATATATAAAAACAAAACAAGC  | NotI              |

**Supplementary Table S7: Primers for site-directed mutagenesis (SDM)**

| <b>Target Sites</b> | <b>Primer Sequences (5'-3')</b>                                         |
|---------------------|-------------------------------------------------------------------------|
| MRE A               | GAGGAGGAGAACTTCT <b>TGGT</b> CGAGCAGCAGCAGAGCGA                         |
| MRE C               | AGGTGCCACGTCTCCACACT <b>AGTC</b> GACAACTACGCAGC                         |
| Rluc+<br>MRE A      | TGCTGAAGAACGAGCAGCG <b>AGGAGGAGAACTTCTACCAGC</b> ATAATTCTAGGCG<br>ATCGC |
| Rluc+<br>MYC CDS    | TGCTGAAGAACGAGCAGCTCAACGTTAGCTTCAC                                      |

The bold font indicates the mutated nucleotides on the MRE sequence to which the miR-138 seed region binds. The SDM for MRE A and MRE B was performed on the ATG-less *MYC* CDS construct cloned into the psiCHECK-2 vector. The SDM for Rluc+ MRE A was performed to insert the MRE A (red bold font) into the *Renilla luciferase* gene, right before the stop codon. The SDM for Rluc+ MYC CDS was performed to fuse the *Renilla luciferase* gene and the ATG-less *MYC* CDS.
