# Supplementary material for: MiR-138 is a potent regulator of the heterogenous MYC transcript population in cancers
Source: PubMed Central journal article supplement (PMC8856960; doi:10.1038/s41388-021-02084-x), 2021-12-22
Supplement: 41388_2021_2084_MOESM3_ESM.pdf [file 41388_2021_2084_MOESM3_ESM.pdf]

**Supplementary Data File S1. MiRNAs detected in the MYC CDS MS2-TRAP**

| miRNA ID           | Set A   |          |
|--------------------|---------|----------|
|                    | MYC CDS | MYC 3'U  |
| hsa-let-7a-2-3p    | 0.04    | 1.08     |
| hsa-let-7a-3p      | 1.48    | 1.70     |
| hsa-let-7a-5p      | 0.46    | 1.91     |
| hsa-let-7b-3p      | 1.38    | 3.67     |
| hsa-let-7b-5p      | 1.24    | 2.10     |
| hsa-let-7d-3p      | 3.01    | 3.28     |
| hsa-let-7d-5p      | 0.46    | 1.94     |
| hsa-let-7e-3p      | 1.00    | 1.00     |
| hsa-let-7e-5p      | 0.47    | 13.89    |
| hsa-let-7f-1-3p    | 3.27    | 2.99     |
| hsa-let-7f-2-3p    | 741.63  | 1114.21  |
| hsa-let-7f-5p      | 0.12    | 1.14     |
| hsa-let-7g-3p      | 942.93  | 11662.64 |
| hsa-let-7g-5p      | 0.63    | 0.87     |
| hsa-let-7i-5p      | 0.62    | 1.34     |
| hsa-miR-100-5p     | 1.51    | 2.97     |
| hsa-miR-101-3p     | 7.06    | 18.71    |
| hsa-miR-101-5p     | 145.04  | 0.25     |
| hsa-miR-103a-3p    | 1.22    | 2.12     |
| hsa-miR-106a-3p    | 1.00    | 1.00     |
| hsa-miR-106a-5p    | 1.99    | 3.41     |
| hsa-miR-106b-3p    | 1.58    | 1.52     |
| hsa-miR-106b-5p    | 2.87    | 2.90     |
| hsa-miR-107        | 1.90    | 2.20     |
| hsa-miR-10a-3p     | 1.01    | 4.84     |
| hsa-miR-10a-5p     | 1.34    | 3.87     |
| hsa-miR-1207-5p    | 0.48    | 1.93     |
| hsa-miR-1224-3p    | 1765.62 | 1765.62  |
| hsa-miR-1224-5p    | 1.21    | 4.39     |
| hsa-miR-122-5p     | 1.00    | 1.00     |
| hsa-miR-1226-3p    | 2.36    | 1.53     |
| hsa-miR-125a-3p    | 0.56    | 2.67     |
| hsa-miR-125a-5p    | 1.84    | 1.93     |
| hsa-miR-125b-5p    | 1.42    | 2.08     |
| hsa-miR-126-3p     | 1.31    | 3.07     |
| hsa-miR-126-5p     | 1.91    | 7.19     |
| hsa-miR-1271-5p    | 1.00    | 1.00     |
| hsa-miR-1275       | 1.72    | 2.02     |
| hsa-miR-1280 (v18) | 2.45    | 1.82     |
| hsa-miR-128-3p     | 2.11    | 2.45     |
| hsa-miR-1285-3p    | 6.78    | 3.98     |
| hsa-miR-1290       | 0.37    | 0.39     |
| hsa-miR-1291       | 8.54    | 116.41   |
| hsa-miR-1299       | 0.02    | 1.00     |
| hsa-miR-130a-3p    | 3.62    | 4.50     |
| hsa-miR-130b-3p    | 2.59    | 2.93     |
| hsa-miR-130b-5p    | 0.95    | 2.29     |

| miRNA ID           | Set B   |           |
|--------------------|---------|-----------|
|                    | MYC CDS | MYC 3'U   |
| hsa-let-7a-3p      | 1.15    | 0.38      |
| hsa-let-7a-5p      | 0.19    | 0.22      |
| hsa-let-7b-3p      | 0.99    | 0.60      |
| hsa-let-7b-5p      | 0.77    | 1.51      |
| hsa-let-7d-3p      | 1.64    | 1.05      |
| hsa-let-7e-3p      | 0.51    | 2.11      |
| hsa-let-7e-5p      | 0.15    | 0.76      |
| hsa-let-7f-1-3p    | 1.14    | 0.98      |
| hsa-let-7f-2-3p    | 186.80  | 2.31      |
| hsa-let-7f-5p      | 1.29    | 0.98      |
| hsa-let-7g-3p      | 0.21    | 0.01      |
| hsa-let-7g-5p      | 0.56    | 0.71      |
| hsa-let-7i-5p      | 0.45    | 0.65      |
| hsa-miR-100-3p     | 10.51   | 2.28      |
| hsa-miR-100-5p     | 0.63    | 0.23      |
| hsa-miR-101-3p     | 0.11    | 0.22      |
| hsa-miR-101-5p     | 0.00    | 0.66      |
| hsa-miR-103a-2-5p  | 11.90   | 393862.97 |
| hsa-miR-103a-3p    | 0.90    | 0.75      |
| hsa-miR-106a-3p    | 6.14    | 394.81    |
| hsa-miR-106a-5p    | 0.14    | 0.21      |
| hsa-miR-106b-3p    | 0.17    | 0.44      |
| hsa-miR-106b-5p    | 0.39    | 0.46      |
| hsa-miR-107        | 0.68    | 0.76      |
| hsa-miR-10a-3p     | 2.22    | 0.37      |
| hsa-miR-10a-5p     | 1.26    | 0.38      |
| hsa-miR-10b-3p     | 0.00    | 0.00      |
| hsa-miR-10b-5p     | 1.88    | 0.38      |
| hsa-miR-1204       | 0.58    | 25.79     |
| hsa-miR-1224-3p    | 1.26    | 6.41      |
| hsa-miR-1224-5p    | 0.21    | 0.35      |
| hsa-miR-1238-3p    | 0.90    | 0.60      |
| hsa-miR-1246       | 2.26    | 0.51      |
| hsa-miR-1254       | 0.02    | 0.02      |
| hsa-miR-1257       | 14.30   | 1070.15   |
| hsa-miR-1258       | 4.09    | 0.66      |
| hsa-miR-125a-3p    | 0.15    | 0.31      |
| hsa-miR-125a-5p    | 0.70    | 0.25      |
| hsa-miR-125b-1-3p  | 6.38    | 10.66     |
| hsa-miR-125b-5p    | 1.74    | 0.84      |
| hsa-miR-126-3p     | 2.28    | 0.48      |
| hsa-miR-126-5p     | 1.14    | 0.51      |
| hsa-miR-1271-5p    | 1.57    | 2.67      |
| hsa-miR-1275       | 0.09    | 0.55      |
| hsa-miR-1280 (v18) | 0.31    | 0.12      |
| hsa-miR-128-3p     | 0.78    | 0.61      |
| hsa-miR-1285-3p    | 0.15    | 0.44      |

|                   |         |         |
|-------------------|---------|---------|
| hsa-miR-132-3p    | 0.88    | 4.22    |
| hsa-miR-133b      | 0.53    | 0.76    |
| hsa-miR-134-5p    | 0.00    | 1.48    |
| hsa-miR-135a-5p   | 0.12    | 1.53    |
| hsa-miR-135b-5p   | 2.63    | 2.58    |
| hsa-miR-139-5p    | 0.88    | 0.44    |
| hsa-miR-1-3p      | 1.00    | 1.00    |
| hsa-miR-140-3p    | 5.12    | 9.88    |
| hsa-miR-141-3p    | 1.05    | 1.49    |
| hsa-miR-142-3p    | 4.61    | 3.90    |
| hsa-miR-142-5p    | 1.00    | 1.00    |
| hsa-miR-143-3p    | 776.70  | 6.22    |
| hsa-miR-145-5p    | 2.73    | 2.67    |
| hsa-miR-146a-5p   | 6019.19 | 0.90    |
| hsa-miR-146b-5p   | 2.59    | 1509.25 |
| hsa-miR-148a-3p   | 2.32    | 2.20    |
| hsa-miR-148a-5p   | 0.19    | 0.00    |
| hsa-miR-148b-3p   | 2.70    | 2.82    |
| hsa-miR-149-5p    | 1.77    | 1.83    |
| hsa-miR-150-5p    | 1.00    | 0.00    |
| hsa-miR-151a-3p   | 1.56    | 2.37    |
| hsa-miR-151a-5p   | 1.96    | 5.89    |
| hsa-miR-152-3p    | 1.68    | 0.20    |
| hsa-miR-154-5p    | 1.00    | 1.00    |
| hsa-miR-15a-3p    | 2.15    | 1.03    |
| hsa-miR-15a-5p    | 2.34    | 2.32    |
| hsa-miR-15b-3p    | 3.05    | 13.25   |
| hsa-miR-15b-5p    | 1.35    | 2.42    |
| hsa-miR-16-5p     | 1.12    | 1.71    |
| hsa-miR-17-3p     | 4.58    | 3.13    |
| hsa-miR-17-5p     | 1.52    | 3.46    |
| hsa-miR-181a-2-3p | 0.02    | 1.00    |
| hsa-miR-181a-5p   | 0.91    | 2.23    |
| hsa-miR-181b-5p   | 1.41    | 1.17    |
| hsa-miR-181c-3p   | 40.58   | 36.32   |
| hsa-miR-181c-5p   | 0.00    | 2.12    |
| hsa-miR-181d-5p   | 0.48    | 0.95    |
| hsa-miR-1825      | 1.00    | 1.00    |
| hsa-miR-182-5p    | 0.75    | 1.40    |
| hsa-miR-183-5p    | 0.61    | 1.96    |
| hsa-miR-185-5p    | 2.38    | 1.50    |
| hsa-miR-186-5p    | 3.54    | 4.83    |
| hsa-miR-188-5p    | 1.63    | 2.16    |
| hsa-miR-18a-3p    | 0.90    | 0.60    |
| hsa-miR-18a-5p    | 0.00    | 0.00    |
| hsa-miR-18b-5p    | 1.90    | 0.68    |
| hsa-miR-191-5p    | 1.31    | 2.91    |
| hsa-miR-192-5p    | 0.74    | 0.46    |
| hsa-miR-193a-3p   | 0.28    | 0.39    |
| hsa-miR-193a-5p   | 1.61    | 2.29    |

|                   |         |       |
|-------------------|---------|-------|
| hsa-miR-1285-5p   | 0.97    | 1.57  |
| hsa-miR-1290      | 0.63    | 1.29  |
| hsa-miR-1291      | 0.51    | 0.04  |
| hsa-miR-129-5p    | 0.67    | 6.45  |
| hsa-miR-1296-5p   | 0.03    | 0.57  |
| hsa-miR-1299      | 0.00    | 0.03  |
| hsa-miR-1304-5p   | 4.42    | 5.16  |
| hsa-miR-130a-3p   | 0.51    | 0.93  |
| hsa-miR-130b-3p   | 0.39    | 0.44  |
| hsa-miR-130b-5p   | 1.33    | 0.28  |
| hsa-miR-132-3p    | 1.89    | 0.79  |
| hsa-miR-133a-3p   | 2.10    | 2.35  |
| hsa-miR-133b      | 32.98   | 0.08  |
| hsa-miR-134-5p    | 159.75  | 51.32 |
| hsa-miR-135a-5p   | 0.26    | 0.05  |
| hsa-miR-135b-5p   | 1.07    | 0.58  |
| hsa-miR-138-5p    | 0.13    | 0.45  |
| hsa-miR-139-5p    | 4.51    | 1.06  |
| hsa-miR-140-3p    | 0.16    | 0.53  |
| hsa-miR-141-3p    | 0.27    | 0.37  |
| hsa-miR-142-3p    | 3.65    | 1.35  |
| hsa-miR-142-5p    | 0.51    | 0.25  |
| hsa-miR-143-3p    | 0.65    | 0.72  |
| hsa-miR-145-3p    | 236.03  | 0.00  |
| hsa-miR-145-5p    | 1.63    | 0.81  |
| hsa-miR-146a-5p   | 0.33    | 1.99  |
| hsa-miR-146b-5p   | 1.52    | 0.49  |
| hsa-miR-148a-3p   | 0.92    | 0.57  |
| hsa-miR-148a-5p   | 0.72    | 1.05  |
| hsa-miR-148b-3p   | 0.66    | 0.59  |
| hsa-miR-148b-5p   | 0.20    | 0.22  |
| hsa-miR-149-5p    | 0.67    | 2.78  |
| hsa-miR-150-5p    | 3175.45 | 0.29  |
| hsa-miR-151a-3p   | 0.32    | 0.67  |
| hsa-miR-151a-5p   | 2.82    | 1.18  |
| hsa-miR-152-3p    | 1.02    | 0.62  |
| hsa-miR-153-3p    | 0.28    | 0.37  |
| hsa-miR-154-3p    | 4.66    | 3.64  |
| hsa-miR-15a-3p    | 0.06    | 3.83  |
| hsa-miR-15a-5p    | 0.96    | 0.78  |
| hsa-miR-15b-3p    | 1.11    | 0.79  |
| hsa-miR-15b-5p    | 0.48    | 0.21  |
| hsa-miR-16-5p     | 1.69    | 0.51  |
| hsa-miR-17-3p     | 0.54    | 1.61  |
| hsa-miR-17-5p     | 2.10    | 0.72  |
| hsa-miR-181a-2-3p | 0.36    | 0.00  |
| hsa-miR-181a-5p   | 0.27    | 0.58  |
| hsa-miR-181b-5p   | 0.17    | 0.38  |
| hsa-miR-181c-3p   | 0.11    | 0.20  |
| hsa-miR-181c-5p   | 0.35    | 0.62  |

|                  |          |          |
|------------------|----------|----------|
| hsa-miR-193b-3p  | 1.43     | 1.90     |
| hsa-miR-194-5p   | 0.34     | 0.38     |
| hsa-miR-195-5p   | 1.55     | 0.01     |
| hsa-miR-196a-5p  | 0.49     | 1.86     |
| hsa-miR-196b-5p  | 0.36     | 1.54     |
| hsa-miR-1973     | 1.22     | 2.10     |
| hsa-miR-197-3p   | 1.74     | 3.36     |
| hsa-miR-199a-5p  | 0.68     | 0.93     |
| hsa-miR-199b-3p  | 0.02     | 35.99    |
| hsa-miR-199b-5p  | 0.06     | 3027.97  |
| hsa-miR-19a-3p   | 1.33     | 3.11     |
| hsa-miR-19b-3p   | 3.67     | 3.63     |
| hsa-miR-200b-3p  | 0.77     | 1.79     |
| hsa-miR-200b-5p  | 2.32     | 3.14     |
| hsa-miR-200c-3p  | 1.69     | 3.21     |
| hsa-miR-200c-5p  | 6.04     | 7.12     |
| hsa-miR-203a-3p  | 1.07     | 1.08     |
| hsa-miR-204-5p   | 1.00     | 1.00     |
| hsa-miR-205-5p   | 2.56     | 0.38     |
| hsa-miR-206      | 1.00     | 1.00     |
| hsa-miR-20a-5p   | 2.24     | 4.01     |
| hsa-miR-2113     | 1.04     | 0.61     |
| hsa-miR-21-3p    | 2.17     | 1.87     |
| hsa-miR-214-3p   | 1.57     | 931.72   |
| hsa-miR-215-5p   | 1.00     | 188.11   |
| hsa-miR-21-5p    | 2.61     | 4.32     |
| hsa-miR-216a-5p  | 1065.88  | 37.56    |
| hsa-miR-219a-5p  | 1.44     | 2.73     |
| hsa-miR-221-3p   | 1.22     | 2.62     |
| hsa-miR-221-5p   | 3.80     | 11.07    |
| hsa-miR-222-3p   | 1.31     | 1.67     |
| hsa-miR-223-3p   | 0.08     | 1.13     |
| hsa-miR-22-3p    | 6.75     | 12.54    |
| hsa-miR-224-5p   | 0.14     | 0.38     |
| hsa-miR-22-5p    | 21.61    | 0.00     |
| hsa-miR-2355-3p  | 0.71     | 100.59   |
| hsa-miR-2355-5p  | 1.00     | 1.00     |
| hsa-miR-23a-3p   | 1.96     | 1.30     |
| hsa-miR-23b-3p   | 2.28     | 4.26     |
| hsa-miR-23b-5p   | 2.13     | 0.00     |
| hsa-miR-23c      | 1.00     | 1.00     |
| hsa-miR-24-3p    | 2.02     | 3.00     |
| hsa-miR-25-3p    | 1.13     | 2.08     |
| hsa-miR-25-5p    | 0.70     | 0.85     |
| hsa-miR-26a-2-3p | 381.63   | 154.42   |
| hsa-miR-26a-5p   | 1.00     | 1.00     |
| hsa-miR-26b-5p   | 59570.36 | 59570.36 |
| hsa-miR-27a-3p   | 1.75     | 0.96     |
| hsa-miR-27a-5p   | 0.01     | 0.21     |
| hsa-miR-27b-3p   | 1.95     | 2.31     |

|                  |          |          |
|------------------|----------|----------|
| hsa-miR-181d-5p  | 0.39     | 0.55     |
| hsa-miR-182-3p   | 0.10     | 0.19     |
| hsa-miR-182-5p   | 0.79     | 0.66     |
| hsa-miR-183-5p   | 2.58     | 0.51     |
| hsa-miR-184      | 0.16     | 0.10     |
| hsa-miR-185-5p   | 0.60     | 0.59     |
| hsa-miR-186-5p   | 0.27     | 0.90     |
| hsa-miR-188-5p   | 1.15     | 3.09     |
| hsa-miR-18a-3p   | 0.38     | 0.50     |
| hsa-miR-18a-5p   | 0.29     | 0.69     |
| hsa-miR-18b-5p   | 1.22     | 0.46     |
| hsa-miR-1915-5p  | 0.17     | 0.34     |
| hsa-miR-191-5p   | 0.46     | 0.52     |
| hsa-miR-192-3p   | 5.94     | 4.36     |
| hsa-miR-192-5p   | 0.52     | 0.67     |
| hsa-miR-193a-3p  | 0.20     | 4.01     |
| hsa-miR-193a-5p  | 1.54     | 0.76     |
| hsa-miR-193b-3p  | 0.22     | 0.46     |
| hsa-miR-193b-5p  | 0.02     | 0.21     |
| hsa-miR-194-5p   | 0.18     | 0.53     |
| hsa-miR-195-5p   | 0.97     | 0.24     |
| hsa-miR-196a-5p  | 0.59     | 0.41     |
| hsa-miR-196b-3p  | 0.02     | 0.05     |
| hsa-miR-196b-5p  | 0.62     | 0.52     |
| hsa-miR-1973     | 0.20     | 0.20     |
| hsa-miR-197-3p   | 1.86     | 0.89     |
| hsa-miR-199b-3p  | 3.04     | 0.38     |
| hsa-miR-199b-5p  | 0.41     | 0.34     |
| hsa-miR-19a-3p   | 0.56     | 0.41     |
| hsa-miR-19b-1-5p | 0.69     | 1.80     |
| hsa-miR-19b-3p   | 0.49     | 0.46     |
| hsa-miR-200b-3p  | 1.53     | 0.30     |
| hsa-miR-200c-3p  | 1.55     | 0.31     |
| hsa-miR-200c-5p  | 1.10     | 0.61     |
| hsa-miR-203a-3p  | 0.43     | 0.30     |
| hsa-miR-204-5p   | 4.49     | 0.28     |
| hsa-miR-205-5p   | 0.51     | 0.49     |
| hsa-miR-208b-3p  | 28.00    | 0.57     |
| hsa-miR-20a-3p   | 2.59     | 0.27     |
| hsa-miR-20a-5p   | 1.49     | 0.46     |
| hsa-miR-212-3p   | 2.61     | 2.37     |
| hsa-miR-21-3p    | 0.07     | 0.39     |
| hsa-miR-214-3p   | 0.59     | 0.47     |
| hsa-miR-215-5p   | 31676.92 | 3.26     |
| hsa-miR-21-5p    | 0.97     | 0.29     |
| hsa-miR-218-1-3p | 5.52     | 0.31     |
| hsa-miR-218-5p   | 1.00     | 54158.05 |
| hsa-miR-219a-5p  | 0.00     | 0.10     |
| hsa-miR-221-3p   | 0.14     | 0.41     |
| hsa-miR-221-5p   | 1.71     | 0.70     |

|                  |        |         |
|------------------|--------|---------|
| hsa-miR-27b-5p   | 2.85   | 1.55    |
| hsa-miR-28-3p    | 1.11   | 2.76    |
| hsa-miR-28-5p    | 26.35  | 30.25   |
| hsa-miR-297      | #####  | 5067.65 |
| hsa-miR-299-3p   | 58.27  | 1076.28 |
| hsa-miR-29a-3p   | 1.46   | 2.64    |
| hsa-miR-29a-5p   | 1.95   | 2.58    |
| hsa-miR-29b-1-5p | 1.75   | 2.61    |
| hsa-miR-29b-2-5p | 0.37   | 0.90    |
| hsa-miR-29b-3p   | 3.99   | 3.87    |
| hsa-miR-29c-3p   | 4.47   | 8.42    |
| hsa-miR-29c-5p   | 100.94 | 169.35  |
| hsa-miR-301a-3p  | 2.72   | 4.10    |
| hsa-miR-301b-3p  | 103.75 | 2.78    |
| hsa-miR-30a-3p   | 0.77   | 0.00    |
| hsa-miR-30a-5p   | 1.00   | 318.63  |
| hsa-miR-30b-3p   | 0.88   | 0.00    |
| hsa-miR-30b-5p   | 3.18   | 2.62    |
| hsa-miR-30c-5p   | 2.36   | 2.15    |
| hsa-miR-30d-3p   | 64.50  | 64.50   |
| hsa-miR-30d-5p   | 2.88   | 4.96    |
| hsa-miR-30e-3p   | 0.51   | 2.61    |
| hsa-miR-30e-5p   | 1.96   | 2.70    |
| hsa-miR-320a     | 1.28   | 2.39    |
| hsa-miR-320b     | 1.07   | 1.55    |
| hsa-miR-320c     | 1.72   | 2.71    |
| hsa-miR-320d     | 1.26   | 1.60    |
| hsa-miR-320e     | 1.19   | 0.39    |
| hsa-miR-323a-3p  | 0.88   | 0.61    |
| hsa-miR-324-3p   | 1.69   | 4.46    |
| hsa-miR-324-5p   | 1.82   | 1.43    |
| hsa-miR-32-5p    | 1.44   | 4.43    |
| hsa-miR-326      | 1.25   | 1.41    |
| hsa-miR-330-3p   | 2.07   | 5.16    |
| hsa-miR-331-5p   | 0.00   | 0.01    |
| hsa-miR-335-3p   | 4.32   | 1.68    |
| hsa-miR-335-5p   | 0.01   | 0.34    |
| hsa-miR-337-5p   | 0.00   | 0.00    |
| hsa-miR-338-3p   | 0.00   | 0.00    |
| hsa-miR-338-5p   | 1.00   | 52.16   |
| hsa-miR-339-3p   | 1.91   | 1.71    |
| hsa-miR-339-5p   | 1.50   | 1.60    |
| hsa-miR-33a-5p   | 1.85   | 4.04    |
| hsa-miR-340-5p   | 14.09  | 21.76   |
| hsa-miR-342-5p   | 0.52   | 11.39   |
| hsa-miR-345-5p   | 1.24   | 1.84    |
| hsa-miR-346      | 0.94   | 1.10    |
| hsa-miR-34a-5p   | 1.75   | 2.08    |
| hsa-miR-34b-5p   | 10.93  | 4.91    |
| hsa-miR-361-5p   | 0.95   | 3.14    |

|                  |       |          |
|------------------|-------|----------|
| hsa-miR-222-3p   | 0.65  | 0.88     |
| hsa-miR-223-3p   | 1.52  | 0.21     |
| hsa-miR-22-3p    | 0.10  | 0.33     |
| hsa-miR-224-5p   | 0.96  | 0.30     |
| hsa-miR-22-5p    | 0.69  | 1.05     |
| hsa-miR-2355-3p  | 15.11 | 1.12     |
| hsa-miR-23a-3p   | 0.87  | 0.57     |
| hsa-miR-23a-5p   | 0.16  | 0.64     |
| hsa-miR-23b-3p   | 0.88  | 0.55     |
| hsa-miR-23c      | 0.12  | 0.43     |
| hsa-miR-24-3p    | 1.44  | 0.73     |
| hsa-miR-25-3p    | 0.86  | 0.74     |
| hsa-miR-25-5p    | 0.49  | 1.83     |
| hsa-miR-26a-5p   | 1.27  | 0.51     |
| hsa-miR-27a-3p   | 0.52  | 0.47     |
| hsa-miR-27a-5p   | 0.41  | 0.23     |
| hsa-miR-27b-3p   | 0.20  | 0.46     |
| hsa-miR-27b-5p   | 4.53  | 0.38     |
| hsa-miR-28-3p    | 0.50  | 0.57     |
| hsa-miR-28-5p    | 1.97  | 0.57     |
| hsa-miR-296-3p   | 59.46 | 19797.01 |
| hsa-miR-296-5p   | 0.21  | 0.20     |
| hsa-miR-297      | 14.19 | 3.51     |
| hsa-miR-299-3p   | 0.03  | 9.34     |
| hsa-miR-29a-3p   | 0.82  | 0.43     |
| hsa-miR-29a-5p   | 0.43  | 0.74     |
| hsa-miR-29b-2-5p | 0.74  | 1.32     |
| hsa-miR-29b-3p   | 0.05  | 0.18     |
| hsa-miR-29c-3p   | 0.90  | 0.74     |
| hsa-miR-29c-5p   | 0.47  | 0.73     |
| hsa-miR-300      | 72.76 | 164.56   |
| hsa-miR-301a-3p  | 1.04  | 0.85     |
| hsa-miR-301b-3p  | 22.20 | 0.59     |
| hsa-miR-302b-3p  | 0.70  | 1.08     |
| hsa-miR-302c-5p  | 1.73  | 0.44     |
| hsa-miR-302f     | 0.96  | 0.55     |
| hsa-miR-30a-3p   | 15.76 | 17.32    |
| hsa-miR-30b-5p   | 2.27  | 0.71     |
| hsa-miR-30c-5p   | 1.62  | 0.50     |
| hsa-miR-30d-3p   | 0.65  | 0.90     |
| hsa-miR-30e-3p   | 0.45  | 0.36     |
| hsa-miR-30e-5p   | 0.13  | 0.18     |
| hsa-miR-320a     | 0.49  | 0.56     |
| hsa-miR-320b     | 0.74  | 0.49     |
| hsa-miR-320c     | 1.05  | 1.27     |
| hsa-miR-320d     | 0.56  | 0.94     |
| hsa-miR-320e     | 0.25  | 1.36     |
| hsa-miR-323a-3p  | 3.93  | 12.88    |
| hsa-miR-324-3p   | 0.30  | 2.28     |
| hsa-miR-324-5p   | 0.50  | 0.75     |

|                 |         |            |
|-----------------|---------|------------|
| hsa-miR-362-3p  | 5.22    | 1.88       |
| hsa-miR-362-5p  | 4.18    | 6.54       |
| hsa-miR-363-3p  | 1.00    | 1.00       |
| hsa-miR-365a-3p | 5.46    | 9.02       |
| hsa-miR-365b-5p | 0.01    | 0.00       |
| hsa-miR-369-5p  | 1.00    | 1.00       |
| hsa-miR-374a-3p | 1.00    | 1.00       |
| hsa-miR-374a-5p | 1.05    | 6.32       |
| hsa-miR-374b-5p | 0.90    | 0.01       |
| hsa-miR-374c-5p | 420.52  | 4114.87    |
| hsa-miR-375     | 1.91    | 2.40       |
| hsa-miR-376b-3p | 1.00    | 122.67     |
| hsa-miR-377-3p  | 4.58    | 391.65     |
| hsa-miR-378a-3p | 1.19    | 1.84       |
| hsa-miR-378a-5p | 13.89   | 4.68       |
| hsa-miR-378c    | 0.94    | 1.21       |
| hsa-miR-379-3p  | 0.01    | 142.42     |
| hsa-miR-379-5p  | 1.00    | 0.02       |
| hsa-miR-381-3p  | 0.75    | 0.44       |
| hsa-miR-382-5p  | 0.02    | 1.00       |
| hsa-miR-411-3p  | 3422.23 | 36.33      |
| hsa-miR-411-5p  | 0.76    | 0.76       |
| hsa-miR-421     | 7.54    | 28.78      |
| hsa-miR-423-5p  | 1.80    | 2.81       |
| hsa-miR-424-5p  | 1.51    | 268.93     |
| hsa-miR-425-3p  | 0.57    | 2.98       |
| hsa-miR-425-5p  | 2.46    | 2.27       |
| hsa-miR-4257    | 1.00    | 15.39      |
| hsa-miR-4306    | 0.49    | 2517110.71 |
| hsa-miR-431-5p  | 1.00    | 1.00       |
| hsa-miR-449c-5p | 1.77    | 3.55       |
| hsa-miR-451a    | 0.10    | 0.19       |
| hsa-miR-452-5p  | 1.90    | 0.30       |
| hsa-miR-454-3p  | 3.23    | 8.28       |
| hsa-miR-454-5p  | 1.00    | 0.53       |
| hsa-miR-455-5p  | 1.30    | 1.73       |
| hsa-miR-4732-3p | 1.00    | 1.00       |
| hsa-miR-483-3p  | 3.98    | 1.77       |
| hsa-miR-483-5p  | 13.80   | 75.83      |
| hsa-miR-484     | 2.12    | 1.88       |
| hsa-miR-485-3p  | 60.71   | 60.71      |
| hsa-miR-486-5p  | 0.44    | 0.40       |
| hsa-miR-487a-3p | 0.00    | 0.00       |
| hsa-miR-487b-3p | 1.00    | 1.00       |
| hsa-miR-491-5p  | 0.60    | 1.90       |
| hsa-miR-493-3p  | 0.01    | 0.01       |
| hsa-miR-493-5p  | 0.89    | 1.00       |
| hsa-miR-495-3p  | 6.32    | 6.32       |
| hsa-miR-500a-3p | 0.38    | 1.93       |
| hsa-miR-500b-5p | 0.00    | 2.51       |

|                 |         |        |
|-----------------|---------|--------|
| hsa-miR-32-5p   | 0.24    | 0.97   |
| hsa-miR-326     | 0.00    | 0.00   |
| hsa-miR-328-3p  | 0.44    | 1.22   |
| hsa-miR-330-3p  | 2.16    | 1.40   |
| hsa-miR-330-5p  | 0.64    | 71.55  |
| hsa-miR-331-5p  | 0.14    | 0.45   |
| hsa-miR-335-3p  | 1.02    | 0.22   |
| hsa-miR-335-5p  | 0.96    | 0.07   |
| hsa-miR-338-3p  | 0.00    | 0.56   |
| hsa-miR-339-3p  | 0.29    | 0.65   |
| hsa-miR-33a-5p  | 0.01    | 0.39   |
| hsa-miR-340-5p  | 2.06    | 0.31   |
| hsa-miR-342-5p  | 2.20    | 2.72   |
| hsa-miR-345-5p  | 0.58    | 0.94   |
| hsa-miR-346     | 1.46    | 1.17   |
| hsa-miR-34a-3p  | 0.32    | 0.39   |
| hsa-miR-34a-5p  | 0.39    | 0.97   |
| hsa-miR-34b-5p  | 12.95   | 0.51   |
| hsa-miR-361-5p  | 1.26    | 0.36   |
| hsa-miR-362-3p  | 1.16    | 0.15   |
| hsa-miR-362-5p  | 1.30    | 0.50   |
| hsa-miR-365a-3p | 1.61    | 0.39   |
| hsa-miR-365b-5p | 0.93    | 0.60   |
| hsa-miR-372-3p  | 2.45    | 60.24  |
| hsa-miR-374a-3p | 1.01    | 0.25   |
| hsa-miR-374a-5p | 1.73    | 0.28   |
| hsa-miR-374b-5p | 2.17    | 0.13   |
| hsa-miR-374c-5p | 3.55    | 0.89   |
| hsa-miR-375     | 1.14    | 0.53   |
| hsa-miR-376a-5p | 6.27    | 43.89  |
| hsa-miR-376b-3p | 5.92    | 22.61  |
| hsa-miR-377-3p  | 5010.33 | 0.46   |
| hsa-miR-378a-3p | 1.43    | 0.98   |
| hsa-miR-378a-5p | 0.12    | 0.32   |
| hsa-miR-378c    | 0.85    | 1.94   |
| hsa-miR-379-3p  | 4.90    | 103.41 |
| hsa-miR-379-5p  | 0.12    | 0.61   |
| hsa-miR-382-5p  | 0.63    | 0.32   |
| hsa-miR-411-3p  | 0.01    | 0.14   |
| hsa-miR-411-5p  | 1.02    | 4.25   |
| hsa-miR-421     | 1.24    | 0.34   |
| hsa-miR-423-5p  | 0.85    | 1.42   |
| hsa-miR-424-5p  | 0.14    | 1.11   |
| hsa-miR-425-3p  | 0.72    | 1.10   |
| hsa-miR-425-5p  | 1.29    | 0.50   |
| hsa-miR-429     | 1.71    | 0.46   |
| hsa-miR-4306    | 112.87  | 0.67   |
| hsa-miR-449c-3p | 127.58  | 94.72  |
| hsa-miR-449c-5p | 0.45    | 0.42   |
| hsa-miR-450a-5p | 0.91    | 1.00   |

|                   |        |         |
|-------------------|--------|---------|
| hsa-miR-501-3p    | 1.36   | 7.08    |
| hsa-miR-501-5p    | 2.17   | 6.71    |
| hsa-miR-502-3p    | 0.75   | 4.32    |
| hsa-miR-503-5p    | 0.00   | 1.00    |
| hsa-miR-505-3p    | 1.34   | 0.76    |
| hsa-miR-532-3p    | 1.28   | 1.70    |
| hsa-miR-532-5p    | 1.14   | 3.54    |
| hsa-miR-539-5p    | 1.00   | 1.00    |
| hsa-miR-542-5p    | 2.01   | 2.34    |
| hsa-miR-550a-3p   | 1.13   | 1.32    |
| hsa-miR-550a-5p   | 55.02  | 0.60    |
| hsa-miR-551b-3p   | 0.01   | 0.01    |
| hsa-miR-576-5p    | 191.42 | 2.25    |
| hsa-miR-579-3p    | 1.00   | 1.00    |
| hsa-miR-582-5p    | 3.78   | 0.54    |
| hsa-miR-584-5p    | 1.27   | 1.45    |
| hsa-miR-589-5p    | 1.39   | 1.52    |
| hsa-miR-596       | 114.83 | 1.00    |
| hsa-miR-597-5p    | 1.11   | 0.84    |
| hsa-miR-598-3p    | 1.04   | 59.49   |
| hsa-miR-616-3p    | 0.26   | 0.27    |
| hsa-miR-616-5p    | 2.33   | 0.74    |
| hsa-miR-620       | 1.00   | 2234.13 |
| hsa-miR-625-5p    | 0.00   | 5.25    |
| hsa-miR-627-5p    | 0.01   | 0.01    |
| hsa-miR-628-5p    | 0.15   | 0.15    |
| hsa-miR-629-3p    | 2.02   | 1.20    |
| hsa-miR-629-5p    | 1.63   | 2.20    |
| hsa-miR-651-5p    | 1.26   | 1703.37 |
| hsa-miR-652-3p    | 0.87   | 1.18    |
| hsa-miR-660-5p    | 6.95   | 6.42    |
| hsa-miR-671-3p    | 0.74   | 3.85    |
| hsa-miR-708-5p    | 1.23   | 0.85    |
| hsa-miR-720 (v18) | 4.99   | 1.66    |
| hsa-miR-769-5p    | 0.43   | 1.82    |
| hsa-miR-874-3p    | 1.00   | 1.00    |
| hsa-miR-885-5p    | 0.15   | 0.36    |
| hsa-miR-92a-3p    | 1.86   | 3.88    |
| hsa-miR-92b-3p    | 1.39   | 2.44    |
| hsa-miR-92b-5p    | 8.92   | 3.71    |
| hsa-miR-93-3p     | 1.83   | 2.10    |
| hsa-miR-9-3p      | 2.42   | 7.53    |
| hsa-miR-95-3p     | 4.68   | 323.35  |
| hsa-miR-96-5p     | 1.50   | 1.65    |
| hsa-miR-99a-3p    | 0.21   | 0.39    |
| hsa-miR-99a-5p    | 1.44   | 2.58    |
| hsa-miR-99b-3p    | 1.62   | 1.77    |
| hsa-miR-99b-5p    | 1.41   | 2.21    |

|                 |        |         |
|-----------------|--------|---------|
| hsa-miR-451a    | 39.26  | 0.39    |
| hsa-miR-452-5p  | 0.66   | 0.78    |
| hsa-miR-454-3p  | 0.67   | 0.24    |
| hsa-miR-454-5p  | 18.48  | 6.82    |
| hsa-miR-455-5p  | 0.37   | 0.61    |
| hsa-miR-4732-5p | 1.52   | 3254.68 |
| hsa-miR-483-3p  | 1.30   | 0.69    |
| hsa-miR-483-5p  | 1.45   | 1.27    |
| hsa-miR-484     | 12.12  | 1.35    |
| hsa-miR-485-3p  | 0.44   | 0.45    |
| hsa-miR-486-5p  | 0.80   | 1.55    |
| hsa-miR-487a-3p | 13.53  | 1.30    |
| hsa-miR-487b-3p | 1.10   | 0.32    |
| hsa-miR-491-5p  | 0.00   | 0.27    |
| hsa-miR-495-3p  | 0.01   | 0.07    |
| hsa-miR-497-5p  | 0.47   | 0.69    |
| hsa-miR-500a-3p | 1.36   | 0.48    |
| hsa-miR-500a-5p | 0.41   | 0.55    |
| hsa-miR-500b-5p | 2.41   | 0.69    |
| hsa-miR-501-3p  | 0.87   | 0.87    |
| hsa-miR-501-5p  | 0.76   | 0.34    |
| hsa-miR-502-3p  | 1.15   | 0.50    |
| hsa-miR-503-5p  | 0.02   | 0.51    |
| hsa-miR-505-3p  | 0.28   | 0.42    |
| hsa-miR-508-5p  | 52.88  | 0.05    |
| hsa-miR-515-3p  | 910.43 | 893.06  |
| hsa-miR-517b-3p | 0.06   | 3.98    |
| hsa-miR-518f-5p | 2.64   | 2.45    |
| hsa-miR-525-5p  | 2.78   | 134.09  |
| hsa-miR-532-3p  | 0.96   | 0.96    |
| hsa-miR-532-5p  | 1.10   | 0.93    |
| hsa-miR-539-5p  | 0.06   | 0.00    |
| hsa-miR-542-5p  | 1.33   | 2.93    |
| hsa-miR-550a-3p | 3.18   | 6.12    |
| hsa-miR-550a-5p | 1.92   | 1.75    |
| hsa-miR-551b-3p | 0.09   | 0.24    |
| hsa-miR-576-5p  | 0.73   | 0.20    |
| hsa-miR-582-5p  | 6.26   | 1.75    |
| hsa-miR-584-5p  | 0.65   | 0.45    |
| hsa-miR-589-5p  | 0.40   | 1.23    |
| hsa-miR-590-5p  | 0.48   | 0.62    |
| hsa-miR-597-5p  | 0.66   | 0.78    |
| hsa-miR-610     | 0.06   | 0.03    |
| hsa-miR-616-3p  | 0.92   | 0.36    |
| hsa-miR-616-5p  | 1.35   | 0.44    |
| hsa-miR-618     | 0.01   | 0.08    |
| hsa-miR-625-5p  | 1.29   | 1.05    |
| hsa-miR-627-5p  | 0.10   | 0.47    |
| hsa-miR-628-3p  | 3.02   | 2.85    |
| hsa-miR-628-5p  | 5.61   | 0.65    |

|                   |       |        |
|-------------------|-------|--------|
| hsa-miR-629-3p    | 1.40  | 0.81   |
| hsa-miR-629-5p    | 0.58  | 1.33   |
| hsa-miR-642b-3p   | 0.33  | 33.92  |
| hsa-miR-651-5p    | 7.13  | 1.70   |
| hsa-miR-652-3p    | 0.72  | 0.64   |
| hsa-miR-660-5p    | 1.59  | 1.04   |
| hsa-miR-664a-3p   | 0.89  | 0.21   |
| hsa-miR-668-3p    | 31.65 | 605.97 |
| hsa-miR-671-3p    | 0.92  | 1.45   |
| hsa-miR-708-5p    | 4.71  | 10.63  |
| hsa-miR-7-1-3p    | 2.12  | 0.71   |
| hsa-miR-720 (v18) | 1.08  | 0.10   |
| hsa-miR-769-5p    | 0.14  | 0.56   |
| hsa-miR-92a-3p    | 4.65  | 1.34   |
| hsa-miR-92b-3p    | 1.10  | 0.64   |
| hsa-miR-92b-5p    | 0.01  | 0.18   |
| hsa-miR-93-3p     | 0.63  | 0.83   |
| hsa-miR-9-3p      | 0.89  | 0.14   |
| hsa-miR-95-3p     | 2.80  | 1.27   |
| hsa-miR-9-5p      | 0.00  | 0.64   |
| hsa-miR-96-5p     | 0.20  | 1.01   |
| hsa-miR-99a-3p    | 23.24 | 107.72 |
| hsa-miR-99a-5p    | 0.89  | 0.27   |
| hsa-miR-99b-3p    | 1.51  | 1.01   |
| hsa-miR-99b-5p    | 1.49  | 0.67   |

**Supplementary Data File S1. MiRNAs detected in the MYC CDS MS2-TRAP.**

Four miRNAs, miR-184, miR-744, miR-320a, and miR-320b, have been validated to regulate the MYC CDS. MiR-184 and miR-320a were only detected in one set of the pulldowns, but not enriched in the MYC CDS pulldown. MiR-320b was detected in both sets, but not enriched in the MYC CDS. MiR-744 was not in the list of 500 detected miRNAs. Five miRNAs were shortlisted from the miRNA target prediction, miR-125a-3p, miR-138, miR-139-3p, miR-503-5p and miR-744. miR-125a-3p and miR-503-5p were enriched in one set of the pulldowns, while miR-138 and miR-139-3p were not detected in both sets.
