# Supplementary material for: MiR-138 is a potent regulator of the heterogenous MYC transcript population in cancers
Source: PubMed Central journal article supplement (PMC8856960; doi:10.1038/s41388-021-02084-x), 2021-12-22
Supplement: 41388_2021_2084_MOESM4_ESM.pdf [file 41388_2021_2084_MOESM4_ESM.pdf]

## MicroRNA and Target Gene Description:

|               |                                |                |                         |
|---------------|--------------------------------|----------------|-------------------------|
| miRNA Name    | <a href="#">hsa-miR-138-5p</a> | miRNA Sequence | AGCUGGUGUUGUGAAUCAGGCCG |
| Previous Name | hsa-miR-138                    |                |                         |
| Target Score  | 57                             | Seed Location  | 95, 741, 1026           |
| Target Length | 1320                           |                |                         |

---

## Custom Target Sequence

```
1 atgcccctca acgttagctt caccaacagg aactatgacc tcgactacga ctcggtgcag
61 ccgtatttct actgcgacga ggaggagaac ttctaccagc agcagcagca gagcgagctg
121 cagcccccg cgcccagcga ggatatctgg aagaaattcg agctgctgcc caccgccccc
181 ctgtccccta gccgccgctc cgggctctgc tcgccctcct acgttgccgt cacacccttc
241 tcccttcggg gagacaacga cggcggtggc gggagcttct ccacggccga ccagctggag
301 atggtgaccg agctgctggg aggagacatg gtgaaccaga gtttcatctg cgaccgggac
361 gacgagacct tcatcaaaaa catcatcatc caggactgta tgtggagcgg cttctcggcc
421 gccgccaagc tcgtctcaga gaagctggcc tctaccagg ctgcgcgcaa agacagcggc
481 agcccgaacc ccgcccgcg ccacagcgtc tgctccacct ccagcttgta cctgcaggat
541 ctgagcgccg ccgcctcaga gtgcatcgac cctcgggtg tcttccccta cctctcaac
601 gacagcagct cgcccgaagc ctgcgcctcg caagactcca gcgccttctc tccgtcctcg
661 gattctctgc tctcctcgac ggagtcctcc ccgcagggca gccccgagcc cctggtgctc
721 catgaggaga caccgcccac caccagcagc gactctgagg aggaacaaga agatgaggaa
781 gaaatcgatg ttgtttctgt ggaaaagagg caggctcctg gcaaaaggtc agagtctgga
841 tcacctctg ctggaggcca cagcaaacct cctcacagcc cactggtcct caagagggtc
901 cacgtctcca cacatcagca caactacgca gcgcctcct cactcggaa ggactatcct
961 gctgccaaga ggtcaagt ggacagtgtc agagtcctga gacagatcag caacaaccga
1021 aatgcacca gccccaggtc ctcggacacc gaggagaatg tcaagaggcg aacacacaac
1081 gtcttgagc gccagaggag gaacgagcta aaacggagct ttttgccct gcgtgaccag
1141 atcccgaggt tggaaaacaa tgaaaaggcc ccaaggtag ttatcctaa aaaagccaca
1201 gcatacatcc tgtccgtcca agcagaggag caaaagctca tttctgaaga ggacttggtg
1261 cggaaacgac gagaacagtt gaaacacaaa ctgaaacagc tacggaactc ttgtgcgtaa
```

**accagca** – Site 1

**caccagca** – Site 2

**caccagc** – Site 3

## Supplementary Data File S2. Predicted miR-138 binding on the human *MYC* CDS by miRDB

Three MREs were predicted and indicated in blue font. The first MRE is the MRE A which is also predicted by RNA22 and STarMir.
